# Supplementary material
Source: Springer Nature journal article supplement (https://www.springerprofessional.de/resource/supplementary/13677_2013_45_MOESM12_ESM.pdf/10743474)

*Master node*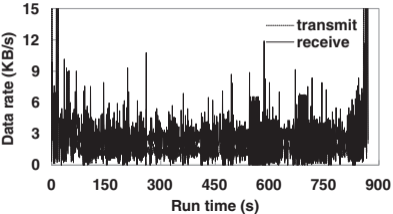*Map node*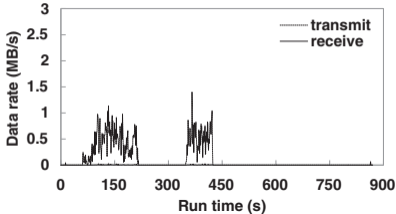*Reduce node*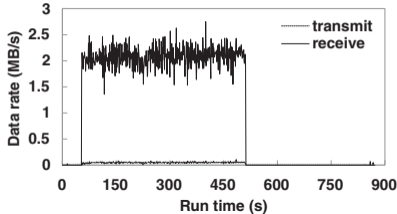

Supplement: MOESM12 [file 10743474]
